# Supplementary material for: Complex Transcriptional Profiles of the PPP1R12A Gene in Cells of the Circulatory System as Revealed by In Silico Analysis and Reverse Transcription PCR
Source: MDPI journal article supplement (doi:10.3390/cells11152315), 2022-07-27
Supplement: s1 [file s1]

## Supplemental Materials

### Supplemental Methods

#### *Calculation of the frequency of splicing variants*

To account for the fact that in many cases the RNAseq reads are not distributed uniformly along the *PPP1R12A* cDNA, calculations were made relative to the regions where splicing events take place. Consider the following example where exon  $E_c$  can be alternatively spliced.

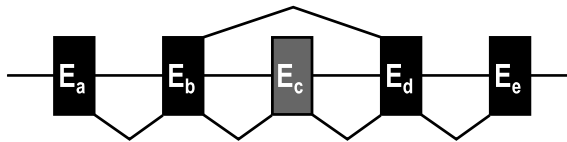

For each region, first the average number of reads spanning constitutive exon junctions was calculated using the following formula:

$$N = [E_a E_b + (E_b E_c + E_b E_d) + (E_c E_d + E_b E_d) + E_d E_e] / 4$$

where  $E_a E_b$  is the number of reads spanning exons  $E_a$  and  $E_b$ , and so on. Variations of the above formula were used for alternative splicing donor or acceptor sites and in regions involving splicing of more than one exon. The frequency (expressed as percentage) of skipping or splicing in of  $E_c$  is calculated as:

$$\% \text{Splicing out} = 100 * E_b E_d / N$$

$$\% \text{Splicing in} = 100 * [(E_b E_c + E_c E_d) / 2] / N$$

To calculate the frequency (expressed as percentage) of each variant we assumed only one exon is alternatively spliced in every variant, as there is no evidence of *PPP1R12A* variants resulting from simultaneous splicing of two or more exons other than E13+E14. The frequency of  $LZ^-$  variants was taken as the frequency of splicing in of E24 ( $LZ^-a$ ) and E24b ( $LZ^-b$ ). The frequency of all other ( $LZ^+$ ) variants was calculated relative to  $(100 - LZ^-a - LZ^-b)$ . For example, the frequency of the  $\Delta E14$  variant was calculated as:

$$\% \Delta E14 = \% \text{Splicing out } E14 * (100 - LZ^-a - LZ^-b) / 100$$

Finally, the frequency of the FL variant was calculated as 100 minus the sum of frequencies of all other variants.

## Supplemental Tables

**Table S1.** Oligonucleotide pairs used for control PCR reactions. Primer pairs are given as forward (top)-reverse (bottom). In the amplicon size column (g) indicates that the primers were tested using genomic DNA as template; (p) indicates that the primers were tested using a plasmid containing the *PPP1R12A* variant encoding the FL MYPT1 variant as a template. The position of the primer pairs and their respective amplicons are shown in Fig. S5A. Primers in blue characters were used exclusively for testing the other member of the pair and not further used in RT-PCR reactions. E19 and E26' were used in combination to test each other and subsequently in separate RT-PCR reactions. Annealing temperature and number of cycles for the PCR reactions are indicated. Where the PCR buffer departed from the standard this is also indicated.

| Primer pair         | Sequence (5'-3')                                  | Amplicon size (bp) | PCR conditions                         |
|---------------------|---------------------------------------------------|--------------------|----------------------------------------|
| E1 <sup>-</sup> -E1 | ATCTGCCCTGTAGAGCCTTG<br>TTCACCTGGTCTTCTGGCGC      | 632 (g)            | 55.4°C, 42x, GC-enriched buffer + DMSO |
| E1-E1               | GGATACTGGAAGTCTCGAGCG<br>TTCACCTGGTCTTCTGGCGC     | 265 (g)            | 55.4°C, 42x, GC-enriched buffer + DMSO |
| E1 <sup>+</sup> -I1 | AGGGGCTAAGAGAAACACTGA<br>CACAAACAGACAATGCACACA    | 158 (g)            | 58°C, 42x                              |
| E1'-E2              | ATGAAATGGCGGACGCG<br>GGTATCCAGCCTTCATTATCAGG      | 326 (p)            | 60°C, 35x                              |
| E4-E8               | CGGCATGCAAAATCTGGAGG<br>TCCTTCTTCTTCTTCATCAACC    | 465 (p)            | 52°C, 35x                              |
| E4'-E8              | TACAGCACTTCACGTTGC<br>TCCTTCTTCTTCTTCATCAACC      | 445 (p)            | 61°C, 35x                              |
| E8-E10              | AGACGTTGATTATTGAACCAGAG<br>GGGACTTGAAGCTGAACGTG   | 461 (p)            | 58°C, 35x                              |
| I9-E9 <sup>+</sup>  | TGTTTGGTGGGGAAATCAGTAA<br>CCTTACTGGGCACAAGAACAATG | 523 (g)            | 58°C, 42x                              |
| E12-E16             | AGGAGAAAATGGGAAGATGATC<br>CTCATCATACGTTCTGGAGTAC  | 705 (p)            | 56°C, 35x                              |
| E21-E26             | AGAAAACCTTACAGCAGCAGG<br>TCAAGGCCCCATTTTCATCC     | 316 (p)            | 56°C, 35x                              |
| E19-E26'            | CAGACACAGAAGAGGGATCCA<br>ATAACTCTGATCAAGGCCCC     | 463 (p)            | 56°C, 35x                              |

**Table S2.** Oligonucleotide pairs used for RT-PCR reactions. Primer pairs are given as forward (top)-reverse (bottom). The position of the primer pairs and expected amplicons for each variant are shown in Figs. 5, 6, S7 and S8. In primers spanning exon boundaries the side of the upstream exon is underlined. Annealing temperature and number of cycles for the PCR reactions are indicated.

| Primer pair         | Sequence (5'-3')                                      | Variants (amplicon sizes in bp)                                                                                      | PCR conditions |
|---------------------|-------------------------------------------------------|----------------------------------------------------------------------------------------------------------------------|----------------|
| E1 <sup>-</sup> -E2 | ATCTGCCCTGTAGAGCCTTG<br>TTCACCTGGTCTTCTGGCGC          | E1 <sup>-</sup> in (447)<br>E1 <sup>-</sup> out (0)                                                                  | 55°C, 35x      |
| E1-E2               | GGATACTGGAAGTCTCGAGCG<br>TTCACCTGGTCTTCTGGCGC         | E1 in (481)<br>E1 out (0)                                                                                            | 56°C, 35x      |
| E1 <sup>+</sup> -E2 | AGGGGCTAAGAGAAACACTGA<br>GGTATCCAGCCTTCATTATCAGG      | E1 <sup>+</sup> in (159)<br>E1 <sup>+</sup> out (0)                                                                  | 55°C, 35x      |
| E4-E8               | CGGCATGCAAAATCTGGAGG<br>TCCTTCTTCTTCTTCATCAACC        | E6 in (465)<br>E6 out (389)                                                                                          | 52°C, 35x      |
| E8-E10              | AGACGTTGATTATTGAACCAGAG<br>GGGACTTGAAGCTGAACGTG       | E9 <sup>+</sup> in (578)<br>E9 <sup>+</sup> out (461)                                                                | 58°C, 35x      |
| E8-E9 <sup>+</sup>  | AGACGTTGATTATTGAACCAGAG<br>CCTTACTGGGCACAAGAACAATG    | E9 <sup>+</sup> in (381)<br>E9 <sup>+</sup> out (0)                                                                  | 58°C, 42x      |
| E12-E16             | AGGAGAAAATGGGAAGATGATC<br>CTCATCATACGTTCTGGAGTAC      | E13 in-E14 in (705)<br>E13b in-E14 in (669)<br>E13 out-E14 in (537)<br>E13 in-E14 out (528)<br>E13 out-E14 out (360) | 54°C, 35x      |
| E21-E26             | AGAAAACCTTACAGCAGCAGG<br>TCAAGGCCCCATTTTCATCC         | E22 in-E24 in (347)<br>E22 in-E24b in (329)<br>E22 in-E24 out (316)<br>E22 out-E24 out (211)                         | 58°C, 35x      |
| E4'-E5.7            | TACAGCACTTCACGTTGC<br>CCGTTTTTCACTATGGAG <u>CACT</u>  | E6 in (0)<br>E6 out (211)                                                                                            | 61°C, 42x      |
| E11-E12.13b         | TGCACCTACAATACCAAGACGA<br>GCTTGGAACACTAGAACTTTTATG    | E13 in (0)<br>E13b in (181)                                                                                          | 53°C, 42x      |
| E19-E21.23          | CAGACACAGAAGAGGGATCCA<br>CAGCAAATCTTCTTGCTCTTT        | E22 in (0)<br>E22 out (210)                                                                                          | 55°C, 42x      |
| E23.24-E26'         | <u>GAAAAAAGGG</u> TGACCGGCAAG<br>ATAACTCTGATCAAGGCCCC | E24 in (159)<br>E24b in (141)                                                                                        | 56°C, 42x      |

**Table S3.** *PPP1R12A* transcripts and protein variants as annotated in Ensembl and GenBank. All transcripts are supported by EST and/or mRNA sequences and for the protein coding variants also by RNAseq data, with the exception of transcript PPP1R12A-223, which is only supported by RNAseq data. The variant considered canonical in Uniprot uses all coding exons except E9<sup>+</sup>, E24 and exons only found in nonsense-mediated decay transcripts (E2<sup>+</sup>, E20<sup>+</sup> and E22<sup>+</sup>). Transcript PPP1R12A-209 is annotated as protein coding but is more likely a nonsense-mediated decay transcript. Most Ensembl transcripts are incomplete and have been extended as shown in Fig. 2 to calculate the predicted protein isoforms.

| Ensembl (GenBank) transcript             | Type                                     | Splicing                                  | Protein isoform (predicted length) (GenBank isoform) |
|------------------------------------------|------------------------------------------|-------------------------------------------|------------------------------------------------------|
| PPP1R12A-201 (NM_001143885.2, variant 2) | Protein coding                           | Canonical, start at E1 <sup>-</sup>       | FL (1030) (isoform a)                                |
| PPP1R12A-202 (NM_001244990.2, variant 4) | Protein coding                           | E22 out, start at E1 <sup>-</sup>         | ΔE22 (995) (isoform c)                               |
| PPP1R12A-203 (NM_002480.3, variant 1)    | Protein coding                           | Canonical, start at E1                    | FL (1030) (isoform a)                                |
| PPP1R12A-204 (NM_001143886.2, variant 3) | Protein coding                           | Start at E1 <sup>+</sup>                  | ΔN (943) (isoform b)                                 |
| PPP1R12A-205                             | Nonsense-mediated decay                  | E22 <sup>+</sup> in                       |                                                      |
| PPP1R12A-206                             | Protein coding                           | E13+E14 out                               | ΔE13+14 (915)                                        |
| PPP1R12A-207                             | Retained intron                          |                                           |                                                      |
| PPP1R12A-208                             | Protein coding                           | E14 out                                   | ΔE14 (971)                                           |
| PPP1R12A-209                             | Protein coding (Nonsense-mediated decay) | E2 <sup>+</sup> in                        |                                                      |
| PPP1R12A-210                             | Retained intron                          |                                           |                                                      |
| PPP1R12A-211                             | Retained intron                          |                                           |                                                      |
| PPP1R12A-212                             | Retained intron                          |                                           |                                                      |
| PPP1R12A-213 (NM_001244992.1, variant 5) | Protein coding                           | E13 out                                   | ΔE13 (974) (isoform d)                               |
| PPP1R12A-214                             | Protein coding                           | E24 in (31 bp variant)                    | LZ-a (1005)                                          |
| PPP1R12A-215                             | Retained intron                          |                                           |                                                      |
| PPP1R12A-216                             | Protein coding                           | E6 out                                    | ΔE6 (1005)                                           |
| PPP1R12A-217                             | Nonsense-mediated decay                  | E20 <sup>+</sup> in                       |                                                      |
| PPP1R12A-218                             | Retained intron                          |                                           |                                                      |
| PPP1R12A-219                             | Retained intron                          |                                           |                                                      |
| PPP1R12A-220                             | Retained intron                          |                                           |                                                      |
| PPP1R12A-221                             | Protein coding                           | Alternative splicing acceptor site in E13 | E13b (1018)                                          |
| PPP1R12A-222                             | Protein coding                           | E24 in (13 bp variant)                    | LZ-b (999)                                           |
| PPP1R12A-223                             | Protein coding                           | E9 <sup>+</sup> in                        | E9+ (1062)                                           |

**Table S4.** Collection of EST clones supporting terminator region T1 approximately 2100 bp downstream of the stop codon. Accession numbers are hyperlinked to the respective GenBank submission. Sequences at the end of each clone were taken directly from the GenBank submission, note that most are in antisense direction. Cleavage sites are highlighted in turquoise unless reliable identification was not possible. \*Clones without a clear polyA stretch but with annotation that an oligo dT was used in the cDNA synthesis. §Clones without a clear polyA stretch and no annotation about an oligo dT being used in the cDNA synthesis.

| Accession number | Tissue or cell type        | Sequence at end of clone                                                      |
|------------------|----------------------------|-------------------------------------------------------------------------------|
| BU620191.1       | Chondrosarcoma cell line   | tttttttttt tttttttt <b>a</b> tagttttatt<br>catttttattt gtatatgtca             |
| CA312676.1       | Lung epithelial cells      | tttttttttt tttttttt <b>ca</b> cacattttaa<br>atagttttat tcattttatt             |
| CN278743.1       | Embryonic stem cell line   | aaatgtattt tgacatatac caataaaatg<br>aataaaact <b>a</b> aaa                    |
| BU677557.1       | Lung epithelial cells      | tttttttttt tttttttt <b>ag</b> ttttattcat<br>tttatttgta tatgtcaaaa tacattttta  |
| CA775922.1       | Pancreatic islet           | ttttttt <b>agg</b> tttattcatt ttatttgtat<br>atgtcaaaat acattttttat            |
| BQ477501.1       | Insulinoma                 | tttttttttt ttttt <b>ag</b> ttt tattcatttt<br>atttgtatat gtcaaaatat            |
| CA310990.1       | Lung epithelial cells      | tttttttttt tttttttt <b>ag</b> ttttattcat<br>tttatttgta tatgtcaaaa tacattttta  |
| BM993875.1       | Subchondral bone           | tttttttttt tttttttt <b>at</b> agntttattc<br>attttatttg tataatgtcaa            |
| CN479410.1       | Subchondral bone           | tttttttttt tttttttt <b>at</b> agntttattc<br>attttatttg tataatgtcaa            |
| BM968622.1       | Lung epithelial cells      | tttttttttt tttttttt <b>ca</b> cacattttaa<br>atagttttat tcattttatt             |
| AW001851.1       | Thymus                     | tttttttttt t <b>c</b> acatttaa aatagtttta<br>ttcattttat ttgtatatgt            |
| CA440121.1       | Chondrosarcoma             | tttttttttt tttttttt <b>aa</b> aatagtttta<br>ttcattttat ttgtatatgt             |
| AI828759.1       | Endometrial adenocarcinoma | tttttttttt <b>a</b> aaatagttt tattcatttt<br>atttgtatat gtcaaaatac             |
| BF197980.1*      | Skin                       | <b>a</b> aaatagttt tattcatttt atttgtatat<br>gtcaaaatac atttttattt             |
| AI342381.1       | Uterus                     | tttttttttt <b>a</b> tagttttat tcattttatt<br>tgtatatgtc aaaatacatt             |
| CD678763.1       | Eye trabecular meshwork    | acatatatac ataaaaatgaa taaaac <b>t</b> aaa<br>aaaaaaaaaa gggcgg               |
| CD677602.1       | Eye trabecular meshwork    | tgacatatac aaataaaatg aataaaact <b>a</b><br>aaaaaaaaaa aaaaaaaaaag            |
| BU608452.1       | Lung epithelial cells      | gacatatatac aataaaatga ataaaact <b>t</b> aa<br>aaaaaaaaaa aaaaaaaaaaa         |
| BU070239.1       | Insulinoma                 | tttttttttt ttttt <b>ag</b> ttt tattcatttt<br>atttgtatat gtcaaaatac atttttattt |
| BQ272332.1       | Insulinoma                 | tttttttttt ttttt <b>ag</b> ttt tattcatttt<br>atttgtatat gtcaaaatac atttttattt |
| BM970383.1       | Lung epithelial cells      | tttttttttt tttttttt <b>ag</b> ttttattcat<br>tttatttgta tatgtcaaaa tacattttta  |
| BM509287.1       | Insulinoma                 | tttttttttt ttttt <b>ag</b> ttt tattcatttt<br>atttgtatat gtcaaaatac            |
| BI492551.1       | Fetal cochlea              | tttttttttt ttttt <b>ag</b> ttt tattcatttt<br>atttgtatat gtcaaaatac            |
| AW675588.1       | Cervix                     | ttttttaatt ttttt <b>ag</b> ttt tattcatttt<br>atttgtatat gtcaaaatac            |
| AW516268.1*      | Endometrial adenocarcinoma | <b>t</b> agttttatt cattttattt gtatatgtca<br>aaatacattt ttatttccaa             |

|             |                                   |                                                                                      |
|-------------|-----------------------------------|--------------------------------------------------------------------------------------|
| AW452563.1  | B cells                           | ttttttttttt tttttttt <sup>agt</sup> tttatttcatt<br>ttatttgtat atgtcaaaat acattttttat |
| AW021595.1  | Fetal cochlea                     | acatatataca ataaaaatgaa taaaact <sup>t</sup> aaa<br>aaaaaaaaaaa aaa                  |
| AI439179.1* | Lymphoma                          | t <sup>agt</sup> tttttatt catttttattt gtatatgtca<br>aaatacattt ttattttccaa           |
| AI453664.1* | Stomach adenocarcinoma            | t <sup>agt</sup> tttttatt catttttattt gtatatgtca<br>aaatacattt ttattttccaa           |
| AA830346.1  | B-cell                            | ttttttttttt ttt <sup>agt</sup> tttta ttcatttttat<br>ttgtatatgt caaaatacat            |
| AI281137.1* | Colon adenocarcinoma              | <sup>agt</sup> tttttattc atttttatttg tatatgtcaa<br>aatacatttt tattttccaaa            |
| AI281011.1* | Colon adenocarcinoma              | <sup>agt</sup> tttttattc atttttatttg tatatgtcaa<br>aatacatttt tattttccaaa            |
| AA262664.1* | B-cell                            | <sup>agt</sup> tttttattc atttttatttg tatatgtcaa<br>aatacatttt tattttccaaa            |
| AW968416.1§ | Colon carcinoma                   | <sup>g</sup> tttttattca tttttatttgt atatgtcaaa<br>atacattttt attttccaaaa             |
| AW967905.1§ | Colon carcinoma                   | <sup>g</sup> tttttattca tttttatttgt atatgtcaaa<br>atacattttt attttccaaaa             |
| AU310314.1§ | Neuroblastoma                     | tt <sup>agt</sup> ttttat tcatttttatt tgtatatgtc<br>aaaatacatt tttattttcca            |
| CK300902.1  | Retina                            | ttttttttttt tttttttt <sup>agt</sup> tttttattcat<br>tttattttgta tatgtcaaaa            |
| BQ189797.1  | Fetal eye                         | gacatatata aataaaatga ataaaaact <sup>t</sup> aa<br>aaaaaaaaaaa aaaaaaggac            |
| BE645430.1  | Prostate                          | tttt <sup>agt</sup> ttttt attcattttta tttgtatatg<br>tcaaaataca tttttattttc           |
| AW316726.1* | Meningioma                        | t <sup>agt</sup> tttttatt catttttattt gtatatgtca<br>aaatacattt ttattttccaa           |
| AW264811.1* | Lung squamous cell carcinoma      | ttt <sup>agg</sup> tttta ttcatttttat ttgtatatgt<br>caaaatacat tttttattttcc           |
| AI678890.1  | Stomach adenocarcinoma            | ttttttttttt ttttt <sup>agt</sup> ttt tattcatttt<br>atttggatat gtcaaaatac             |
| AI082593.1§ | Pooled                            | t <sup>agt</sup> tttttatt catttttattt gtatatgtca<br>aaatacattt ttattttccaa           |
| BM511639.1§ | Insulinoma                        | ttt <sup>att</sup> tcattt ttatttgtat atgtcaaaat<br>acattttttat ttccaaaata            |
| DB507086.2  | Testis                            | taaaaatgta ttttgacata taaaaataaa<br>acgaataaaa ct <sup>t</sup> aaaaaaaaac g          |
| CK300002.1  | Retina                            | ttttttttttt <sup>agt</sup> tttttattc atttttatttg<br>aatatgtcaa aataaaatttt           |
| AI923578.1* | Endometrial adenocarcinoma        | t <sup>agt</sup> tttttatt catttttattt gtatatgtca<br>aaatacattt ttattttccaa           |
| AI342464.1* | Uterus                            | t <sup>att</sup> tcattttt atttgtatat gtcaaaatac<br>attttttattt ccaaaatagt            |
| AI926946.1* | Prostate                          | <sup>agt</sup> tttttattc atttttatttg tatatgtcaa<br>aatacatttt gtattttccaa            |
| AI817061.1  | Lung squamous adenocarcinoma      | tttt <sup>agt</sup> ttttt attcattttta tttgtatatg<br>tcaaaataca tttttattttc           |
| BQ186919.1  | Eye                               | aattttatttt gacatatata aataaaatga<br>ataaaact <sup>t</sup> aa aaaaaaaaaa atataaggac  |
| BE965957.2  | Leiomyosarcoma                    | ttttttttttt ttttttt <sup>at</sup> tag tttttattcat<br>tttattggta tatgtcaaaa           |
| AA282476.1* | B-cells                           | <sup>agt</sup> tttttattc atttttatttg tatatgtcaa<br>aatacatttt tattttccaaa            |
| AI971777.1  | Fibrothecoma                      | ttttttttttt t <sup>agt</sup> tttttatt cattttattt<br>gtatatgtca aaatacattt            |
| AI284479.1* | Esophagus squamous cell carcinoma | <sup>aaa</sup> atagttt tattcatttt atttgtatat<br>gtcaaaatac atttttattt                |
| H89328.1    | Cochlea                           | Taaaaatgta ttttgacata taaaaataaa<br>atggaataaa act <sup>t</sup> aaaaaaaa aa          |

|             |                            |                                                               |
|-------------|----------------------------|---------------------------------------------------------------|
| AW149875.1* | Endometrial adenocarcinoma | t agtttttatt ctttttattt gtatatgtca<br>aaatacatatt ttattttccaa |
| H89329.1*   | Cochlea                    | c atttttattt gtatatgtca aaatacatatt<br>ttattttccaa aatagtgggt |
| DB345733.1§ | Thymus                     | c acattttaaa atagttttat tcattttatt<br>tgtatatgtc aaaatacatt   |
| AW131950.1* | Kidney tumour              | tt agttttat tcattttatt tgtatatgtc<br>aaaatacatt ttattttcca    |
| AI868665.1§ | Pooled                     | t atttcatttt atttgtatat gtcaaaatac<br>atttttattt ccaaaatagt   |
| BI492771.1* | Fetal cochlea              | tt attttgtat atgtcaaaat acatccttat<br>ttccaaaata gtgggttttg   |
| Z40397.1*   | Brain                      | a ttcatTTTT tttgtatatg tcaaaataca<br>tttttatttc caaaatagtg    |
| AI472433.1* | Colon adenocarcinoma       | a aaatagttt tttcatTTTT atttgtatat<br>gtcaaaatac atttttattt    |
| N057465.1*  | Breast carcinoma           | ataaaaatgt attttgacat atacaaataa<br>aatgaataaa actatttttaa    |
| FN057465.1* | Breast carcinoma           | ataaaaatgt attttgacat atacaaataa<br>aatgaataaa actatttttaa    |
| BU960397.1  | Pool                       | aaaatgtatt ttgacatata caaataaaat<br>gaataaaact aaaaaaaaaa     |
| BG169053.1  | Hypernephroma              | ataaaaatgt attttgacat atacaaataa<br>aatgaataaa actaaaaaaaaa   |
| AA903120.1  | Leiomyosarcoma             | tttttttttt t c acacattt aaaatagttt<br>tattcatTTTT atttgtatat  |
| BI966891.1  | Pancreas                   | tttttttttt catggcaaaa tacatttttta<br>tttccaaaat agtgggtttt    |
| DW461699.1  | Liver                      | tacaaataaa atgaataaaa ctatttttaa<br>tgcgcaaaaa aaaaaaaaaa     |

**Table S5.** Collection of EST clones supporting terminator region T2 approximately 2360 bp downstream of the stop codon. Accession numbers are hyperlinked to the respective GenBank submission. Sequences at the end of each clone were taken directly from the GenBank submission, note that most are in antisense direction. Cleavage sites are highlighted in turquoise unless reliable identification was not possible. \*Clones without a clear polyA stretch but with annotation that an oligo dT was used in the cDNA synthesis. §Clones without a clear polyA stretch and no annotation about an oligo dT being used in the cDNA synthesis.

| Accession number | Tissue or cell type        | Sequence at end of clone                                            |
|------------------|----------------------------|---------------------------------------------------------------------|
| AI061415.1       | Gessler Wilms tumour       | tttttttttt tttttt <b>c</b> aga ttctgcatac<br>agacagcttt atgtaaaata  |
| DB524753.2       | Testis                     | atgtttatat attttacata aagctgtctg<br>tatgcag <b>g</b> aaa aaaaaag    |
| BM968507.1       | Lung epithelial cells      | tttttttttt tttttt <b>c</b> tg atacagacag<br>ctttatgtaa aatatataaa   |
| AW673535.1       | Cervix                     | ttatatattt tacataaagc tgtctgtatg<br>ca <b>g</b> aaaaaaaa aaaaaaag   |
| AW273092.1       | Colon carcinoma            | ttttttt <b>c</b> tg catacagaca gctttatgta<br>aaatatataa acatttgtcc  |
| AA913505.1       | Pooled                     | tttttttttt ttt <b>c</b> tgcata cagacagctt<br>tatgtaaaat atataaacat  |
| W32762.1         | Parathyroid tumour         | ntttt <b>c</b> tgca tacagacagc tttatgtaaa<br>atatataaac atttgtccaa  |
| AA047292.1       | Uterus                     | nttttttttt ttt <b>c</b> tgcata cagacagctt<br>tatgtaaaat atataaacat  |
| DB356402.1 §     | 10-week embryo             | <b>c</b> tgcatcacag acagctttat gtaaaatata<br>taaacatttg tccaaattgg  |
| BE328265.1       | Wilms tumours              | ttt <b>g</b> cataca gacagcttta tgtaaaatat<br>ataaacattt gtccaaattg  |
| AW731690.1 *     | Cervix                     | t <b>g</b> catcacaga cagctttatg taaaatatat<br>aaacatttgt ccaaattggt |
| AI004347.1       | Fetus                      | tttttttttt tttttttttt tt <b>c</b> tgcatcac<br>agacagcttt atgtaaaata |
| T89964.1 *       | Lung                       | t <b>g</b> catcacaga cagctttatg taaaatatat<br>aaacatttgt ccaaattggt |
| AA132555.1 *     | Colon carcinoma cell line  | <b>g</b> catcacagac agctttatgt aaaatatata<br>aacatttgtc caaattggta  |
| AI890988.1       | Endometrial adenocarcinoma | tttttttttt tttttttttt tt <b>c</b> tgcatcac<br>agacagcttt atgtaaaata |
| AI004376.1       | Testis                     | tttt <b>g</b> catcac agacagcttt atgtaaaata<br>tataaacatt tgtccaaatt |
| AA027817.1       | Uterus                     | tttttttttt ttttn <b>c</b> tgca nacagacagc<br>tttatgtaaa atatataaac  |
| DB373613.1 §     | Placenta                   | <b>c</b> tgcatcacag acagctttat gtnaaatata<br>taaacatttg tccaaattgg  |
| AW799002.1 §     | Uterus                     | aaaacagctg atgtaaatat ataaacattg<br>tccaatggta cacagatgca           |
| DN914761.1 §     | Breast cancer cell line    | cggaaacaga cagctttatg taaaatatat<br>aaacatttgt ccaaattggt           |



## Supplemental Figures

Exon 1<sup>+</sup> (primer E1-f)

1 gagggAGATCTGCCCTGTAGAGCCTTGGCGTTCCACTGCTGGCCTCCGGATTCCCGGGAGACCCAGCCGACAGGACAACCTTCCTTCCC CGCTTCCTCCTTCCAGgtctgtccaccg 120  
121 ccccgctgcctggccacacccgcttccctctgtgtggtggccagccacacccgcgagttcgccgggagcgctcttccctggggcgggcacaggccccagggcgcatgcactgtgtcgaaagg 240

Exon 1 (primer E1f, E1'f, E1r)

241 cgctccaccgctccggatctcggaaagttacgttagattggccgcgggtgacgggtggccgctgctggggcggggagggctctgtgttgtaggaaggagggtccgcctcgccgggtgcccgcgc 360  
361 cccagtgctctgtgtggaactggaagttcgtgagcgtcgccgtccgggttcccgagccctctctgtggccgcactcatagaaacattcaacaccccctgcctcccctctctccctctccgcgc 480  
481 tcccctctccggctcccccctcgcgataaagaagACC CGGCGGACAGGAGAGGGG AAGATGGCGGAGCGCAAGCAGAAGCGGACGAGCAGCTGAAACGCTGGATCGGCTCCGAGCGGACGATC 600  
601 CGAGCTCCGGTGTGAAGCGCCAGAAAGCTGAGATTGTCAGCATGGCCGCGCTTCCTGGCTGCTTGTCTCCAGCGGCGACGAGCAGGGCTCTCAAGCTGCTGCACCCGCGGCGC 720  
721 CGACATCAATTACGCCAATGTGACGAGGACTCACTGCCCTGCACCAAGctgtgtgcccgcgcgcgcgctctctgacgcgtgagggttctgtgtcgccctctgtcgggcctgccctcagt 840

Exon 1<sup>+</sup> (primer E1f, I1r)

21481 gctgaattctcattaccctctgcgatctagctattgtgtatgtcacatacaagctcctggaaaactccATCATATGCTTGTGAAGAAATGAGAGATTAACCTTGTAGACTTCTGTAAAG 21600  
21601 GGGCTAAGAGAAACACTGCTGCTAAATAATGAGGGGATATACATATGCTTCAAGAGCTGTAAgtattgttaaagatgtttcttcggaaacaaatccacagatttaatacaagtcocaa 21720  
21721 acaaaatcccgagatagtgtgtgcatgtgtgtttgtgtatgcaatgtgtgaaaaatggttaaatgtatataaagatgaaaaaagcaggcgacagccaaagtcaatctttaggaacaagaagatgt 21840

Exon 2 (alternative ATG when transcription starts at E1+) (primer E2r)

62521 agGCTTCTGATGTAGCAACTGTGTATGTGTGAGGTTTCTGGTAGAAATGAGGACAAATTAATCAACCTGATATGAAGGCTGGATACCACCTACATGCAGCAGCTTCCTGTGGATATC 62640  
62641 TTGATATTGCAGAgtaagccagttctgtgttttctatttattcttaatactgtttgacagacctgaatgtttattgtgaagtgtataaagataaatgagtgaacctcttatattactttaattca 62760

Exon 2<sup>+</sup>

86521 gtccacacagGTGTCAACAGGCGAGAGTGGGAACCTGAACCCGAAGCTGTCAGAGCATATAAAGTTTCTGCTTTTTTACCCTCCACCTTTGAATGCTTTTGGAGACTATTATTGGTAGA 86640  
86641 TAAGAATTAATCCACCATAGGATTATCAGTCCgtgagatttgtttattattatttattattatttttcaaagtgcctttgtaacatttacatttgcagtaataagttctagatgtgc 86760

Exon 3

90001 taatatcttttgccttaactatttttcccttggttttacagGTTTTGATTGGTCAAGGAGCACATGTAGGGGCTGTCAACAGTGAAGGAGATACACCTTTAGATATTGCGGAGGAGGAGG 90120  
90121 CAATGGAAGGCTACTTCAAATGAGTTTAAATCGGCCAAGgtataataaaagcaacctaaatgaaaaatgttttagaagaatgtgatatcttcagcaaaaattattgttgcatgt 90240

Exon 4 (primer E4f, E4'f)

102961 tttttacagGGGTGTATATAGAAGCAGCTCGAAAGGAAGAAGACGGATCATGCTTAGAGATGCCAGGCGAGTGGCTAAATAGTGGTCATATAAATGATGTCGGCATGCAAAATCTGGAG 103080  
103081 GTACAGCACTTCCGCTGCTGAGCTGTAAAGGCTATACGGAAGTTTAAAGtaagtatgttttttacagagttttctctattttagttgtctcttttattcattgttcccttttctctaaaa 103200

Exon 5

106921 catgatagatagcttttgcacatgatcatttatttctagattttaaattgattgtcttaattcactgttaattctttagACTTTTAATACAGGCAAGCTATGATGTTAATATTAAAGACTATG 107040  
107041 ATGGCTGGACACCTCTTCATGCTGCTCAGCTCATTTGGGGTAAAGAAGAAGCATGTGCAATTTTAGTGGACAACTGTGTGATATGGAGATGGTCAACAAAGTgttagcggttttaaacgtat 107160

Exon 6

113161 tgtaaaaaatgttatccacgtcttttatataaaattatcacagaattactgaagggcattttatgatttattgacttttgacatccacctcccccctgttttccctacgtatGGCCAAACAG 113280  
113281 CTTTGTGATGTAGCAGTGAAGAGCTTTAGGATATTTAGAGATTTTGAAGAATTTGCAAAAGAAACAAATCTGTatgtttgttagtcaataatgtcctataacttaccttaataatttgaattt 113400

Exon 7

114241 agtaatagtatcttaaatagttttcttattttcccttgcataactttgttacaagaCTCCATAGTGAAAAACGGGACAAGAAATCTCCACTAATTGAATCAACAGCAAAATATGGACATAAT 114360  
114361 CAGTCACAGAGACCTTTAAAAAGgtgagtaaaatattcaagtacatttgttatctttgtttaaagtgagttggcatagtgggcacaggcatgattatttgggatctgggaagaatgaatatat 114480

Exon 8 (primer E8f, E8r)

114481 ttttaacctttgttattcttaatacttggtaacactgttttccctttaaagCAAGAGACGCTGTGATTTGAACAGAGAAAAATGCATCCCGTATTGAATCTCTGGAACAAGAAAGGTTG 114600  
114601 ATGAGAAGAGAGAGGAGAGAAGATGAGTCTAGTGTCTTAGTGAAGAAGATGAGGAAGATGACTCGGAATCAGAAGCTGAACAGgtaaaataaaagataaatgcatttttgttgtaa 114720

Exon 9

117841 taacaaaaccttaaaacaaaattggaatataaaattgatttttcccgccatttgagaccaaataatataatggaattgtgactcttaattgtttgtcttttaagTAAGACAAACCCCTGG 117960  
117961 CTTCTGTAACTAATGGCAACACTTTCTAGTACACAGAGCCTCCTGTAGCTGTGTACAACACTCATGTGTCACTCAGGTCAAGCAACACCTACATCACCCTATTAAAAAGgtaaagccaaatt 118080

Exon 9<sup>+</sup> (primer I9f, E9'r)

124441 tgcatttttttgggtttgtggaagccctttgaaatgataaaattgttctatttattatagtttgaattgaatttgaattgtttgttgggtggaaacagtaaaatttaaggcgtgt 124560  
124561 gattgttaaaaaaaagatataatgtaaaagaaatcagttactagttttttgttattatggaacaaaattttttaaaccagattatcacatggttatcaaaacaaaattcaatgtgt 124680  
124681 cagtgattttgttcagtcacatgcttatattctactctgtatgtcgttttaattgtttgaagattttattagatttttttcaagattctctatgctgataaattgaactttgttcccgatgac 124800  
124801 ttttaaaagattggatcatccaacatttctgtgggttaatttataaaatttttccaaatgaagaaattttttgttcataactcccttttctgttttcttgatgttccaaactttgtgtc 124920  
124921 tttacgtgtctatttttaattgtccttagATGATTTCATTGCTCTCTATCATGCTTGTGTGGAAATCAGTAGATCTCGCATCATGGAGCAGGGCTTGGCAAAACCTGGATTGCTCTG 125040  
125041 TGCCCACTAAGGCTGAAGAAATCTATGgtgaggcatttctatgtgtcaagaatttatattaggttacaacatacaagtttaataataaattgtgttccaagatgcatgtgttttaagtcotta 125160

Exon 10 (primer E10r)

125401 tcagcttttcaaaatttttttttttcttctaaaaataaaataaacacagTTTCCAACACAGCTACAAAAATTTCTCCAAAGAAGAAGAGAAAAAGATGAGTCTCTGCAACTTGGAA 125520  
125521 GCTTAGGACTTGAAGAGACGGGACGATGATGGTGCACTTCTGTAATACAGCATCTAAAGAGGGTCAAGAAAGAAAGATATCGCAGGTGTTCACGTTTCACTTCAAGTCCAGACTTT 125640  
125641 CTTCTCTTTGGATATAAAGAAAGAGgtaatctatttccagctgtggtttctatgaaaactgttatgatttctttccaggaaacataaattgtgtagattttctgtagtttatcttttag 125760

Exon 11 (primer E11f)

126841 gtacccaaaatttaatttttactattttttccctgtgtgtgagGAGAAAGATAGTAAGAGAACTAGGCTTGCATATGTTGCACCTTACAATAGCAAGAGCCTAGCCAGTACATCTGACAT 126960  
126961 TGAAGAGAAAGAAACAGgtgagtttatttgattgtgcttatgcatcactataaaatctttatctatgcattagagtttaatacaatgagcatgttaattatgtgcggatgtgtattg 127080

Exon 12 (primer E12f)

128041 ttcagctttatactaatttactagtgtaccgcttttctaatactattttaaaattatgtacacagaattctgaaggtgtttctttttacagAGATTCTTCAAGTTTGGCAACAAGTAGTTTC 128160  
128161 ATATACAAGGAGAAATGGGAGAGTATCTTAAAAAAATAGCTCAGTAAATGAGGATCAACGTATCATAAAAAGgtataataactattcttaagoggtttttatgtattcattataaa 128280

Exon 13

129121 tgtttagTTGCTCCTTTGGTGAAGAACAAGATGATTTGATTAGTTTCCAGGACCCACATCAACCAACACAGTTTACCTCTGCAGCTGGGCTTCAGAAAAAGCCTGCTTTCCAGCA 129240  
129241 CAAGCACTACTACAAGATTACAACGGGTTCTTCCAGCAGGCGACACAAGAGCAgtaagtcacagatacattttgtgtcagggtctactgtgtgcttatgtatgtcgtgcgtttttgt 129360

Exon 13b (alternative splicing acceptor site)

129121 tgtttagttgtcctttgtgtagaacagaatgattttgattagTTCTAGTGTTCAGGACCCACATCAACCAACACAGTTTACCTCTGCAGCTGGGCTTCAGAAAAAGCCTGCTTTCCAGCA 129240  
129241 CAAGCACTACTACAAGATTACAACGGGTTCTTCCAGCAGGCGACACAAGAGCAgtaagtcacagatacattttgtgtcagggtctactgtgtgcttatgtatgtcgtgcgtttttgt 129360

Exon 14 (primer E14r)

129601 tgtatgtcatgttttttcaagctgtcagaaggtcctttcattgttttagctgttttcccttttctttttttgtgtgtgctgattatgtatgctatgTACCTCAAATCGTTTGTGGGCTGAGGAT 129720  
129721 AGTACTGAGAGAGAAAGGACAGCTGTTCCTCCAGGACGACCACTTCCTGTGCTCCCACTGTGTAAATGCTGCAGCTTCTACCCACACCCCTGACTACAACACTCTGCTGCTGCTCTCC 129840  
129841 TCCACAACAGAGGTCAGGAGAGACGACGATgtgtgttaaaggtcacaacactgtgatatacttctggcaggtgtgaaagttgtttttttttaaacaagatctgttgaggtttgtag 129960

[illegible]

**Figure S1.** Exon composition of *PPP1R12A* and location of PCR primers used in this study. Nucleotide numbering is as per Ensemble transcript PPP1R12A-202. Exons are in upper case except for the part of E1 that is spliced out when transcription starts at E1<sup>-</sup>. Introns are in lower case. Coding sequences are highlighted in turquoise except when E24 is spliced in, in which case the sequence after the alternative stop codon in E25 and E26 is non-coding. Non-coding sequences are highlighted in yellow. Exons of non-sense mediated decay transcripts are highlighted in grey. Translation start and stop codons are highlighted in green and red, respectively. Forward PCR primers are in green characters, reverse PCR primers in red characters except E26<sup>r</sup>, that overlaps with E26r and is underlined. Primers spanning exon boundaries are not indicated. Note duplication of E13, E24, E25 and E26 to accommodate alternative splicing variants.

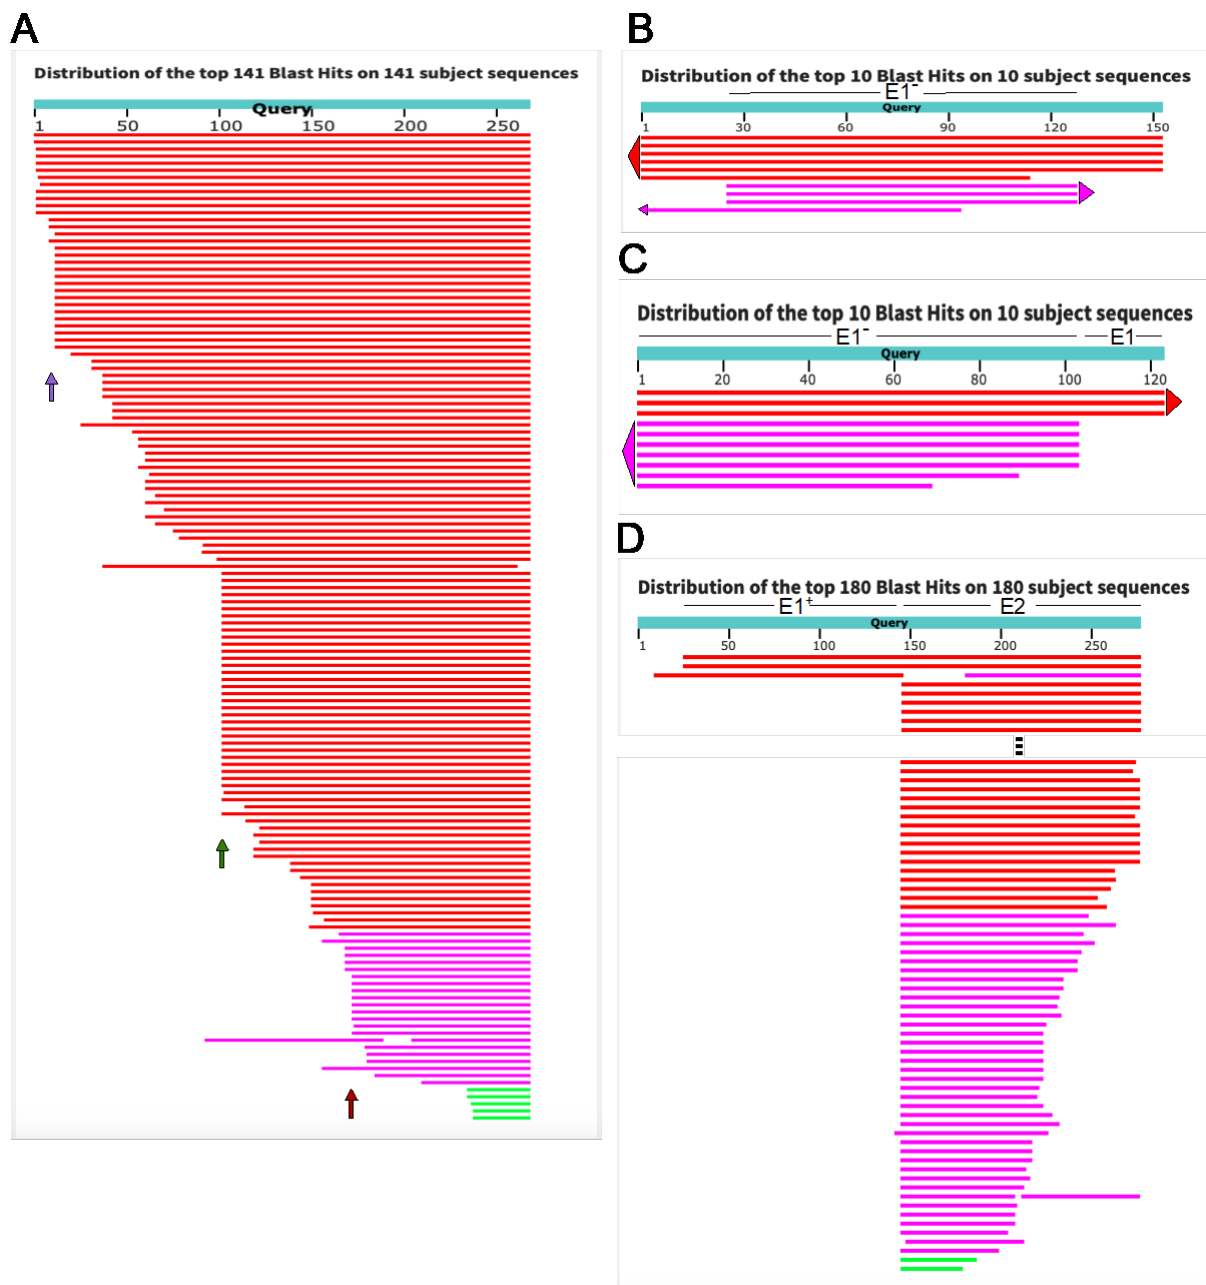

**Figure S2.** Results of BLASTn searches for ESTs in the transcription start regions of *PPP1R12A*. Horizontal bars represent the extent of the alignment of the database sequences to the query sequence and are color-coded by score: red, pink and green from highest to lowest. (A) EST support for a transcription start in E1. The human EST database was interrogated with the sequences corresponding to the UTR of E1 as per transcript PPP1R12-208. Arrows indicate predicted transcription start sites and are colored like in Fig. 1C. (B and C) EST support for a transcription start variant at E1<sup>-</sup>. In (B) the human EST database was interrogated with the sequence corresponding to E1<sup>-</sup> flanked by 25 bases of genomic/intron sequence. The arrowheads indicate the directionality of the clones. Three hits read towards the right and encompass only the E1<sup>-</sup> sequence. The rest read in the opposite direction and correspond to the overlapping antisense gene *PPP1R12A-AS1*. In (C) the human EST database was interrogated with the sequences corresponding to E1<sup>-</sup> and 20 bases of E1 as per transcript PPP1R12A-201. The hits are the same as in panel B: the three top ones correspond to EST clones that contain E1<sup>-</sup> and splice E1<sup>-</sup> into E1, the rest correspond to *PPP1R12A-AS1*. (D) Support for a transcription start variant at E1<sup>+</sup>. The human EST database was interrogated with the sequences corresponding to E1<sup>+</sup>-E2 flanked by 25 bases of genomic/intron sequence before E1<sup>+</sup>. The output has been truncated (dashed line). The two top hits correspond to EST clones that include E1<sup>+</sup>. One EST that covers only E1<sup>+</sup> is flanked by intron sequences and may correspond to amplification of contaminating genomic DNA.

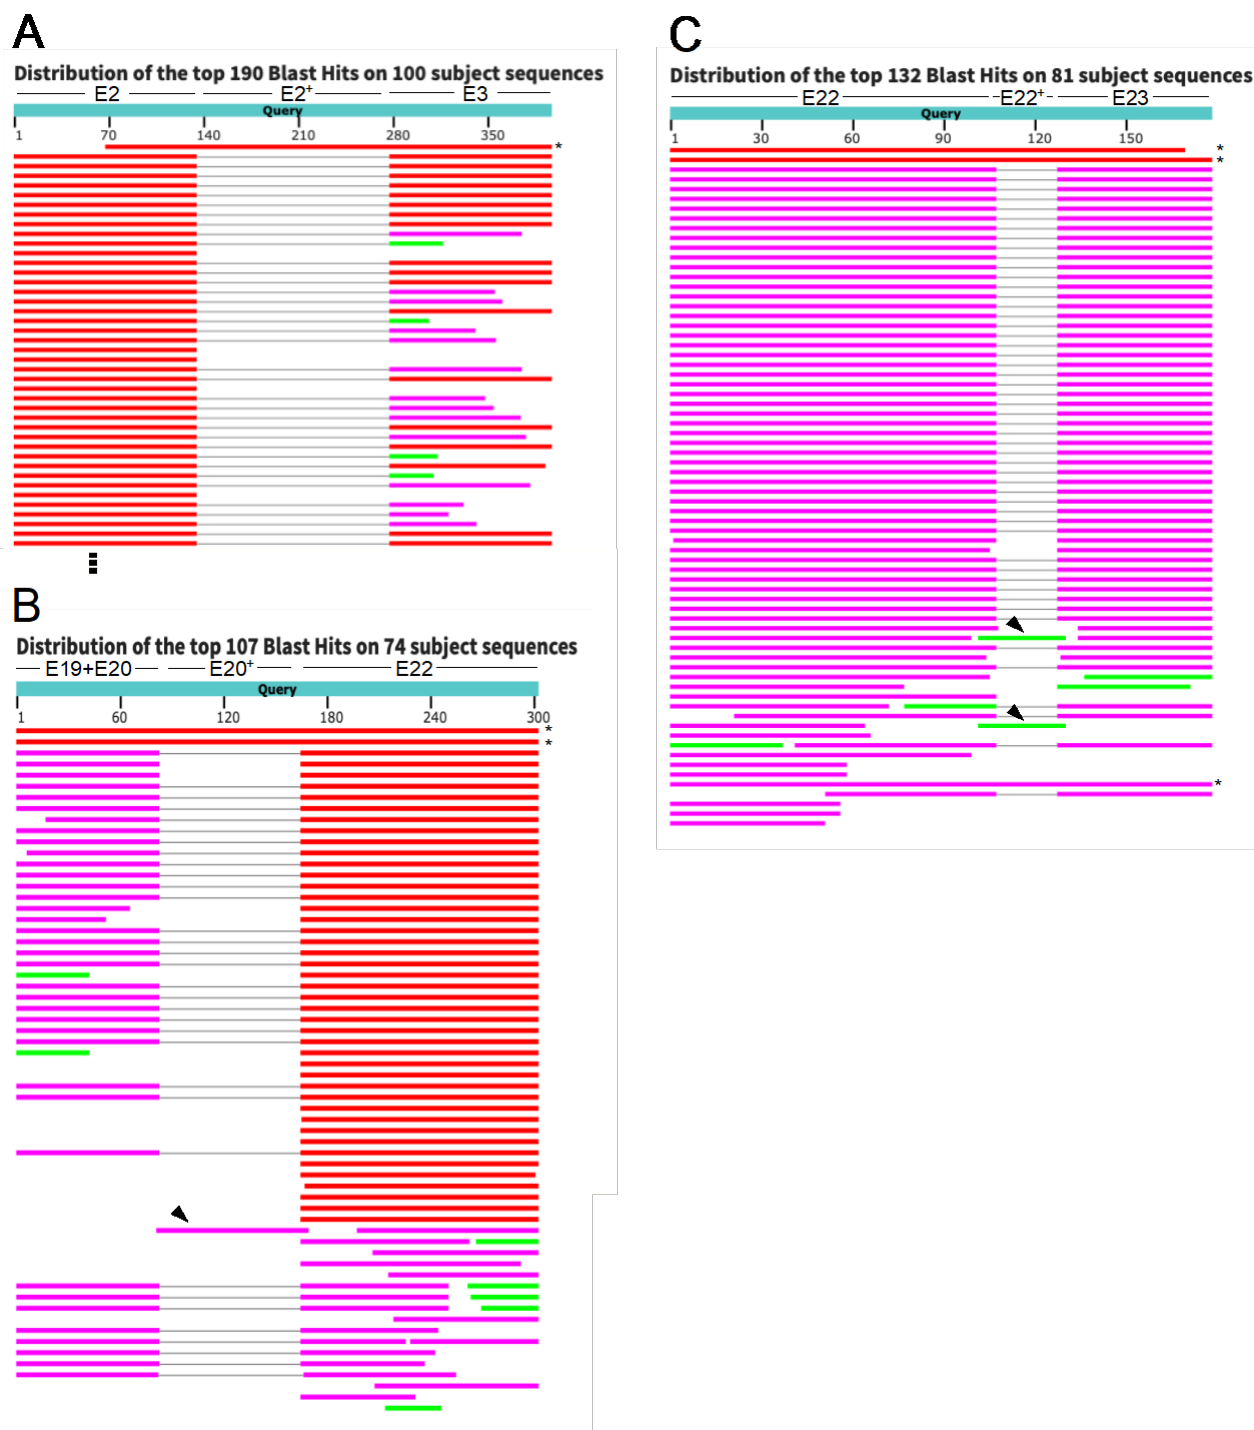

**Figure S3.** Results of BLASTn searches for ESTs in support of transcripts with non-canonical exons. Horizontal bars represent the extent of the alignment of the database sequences to the query sequence and are color-coded by score: red, pink and green from highest to lowest. Separate aligned regions on the same database sequence are connected by a thin grey line. (A) EST support for a splicing variant with 144 bp exon E2<sup>+</sup> (transcript PPP1R12A-209). The EST database was interrogated with the sequences corresponding to E2–E2<sup>+</sup>–E3. The search was limited to 100 hits and only the top 42 hits are shown. A single EST (BP279682.1, asterisk) supports this transcript. The annotation in Ensembl identifies a start codon in E3 that matches the sequence of MYPT1 and interprets the sequences upstream as UTR. It appears more likely that the inclusion of the extra E2<sup>+</sup> would cause a shift to the canonical reading frame, introducing a premature stop codon, therefore this variant would be a nonsense mediated decay mRNA. (B) EST support for a splicing variant with 83 bp exon E20<sup>+</sup> (PPP1R12A-217). This exon causes a frame shift and a premature stop. The EST database was

interrogated with the sequences corresponding to E19–E20–E20<sup>+</sup>–E22. Here E19 was included due to the small size of E20, insufficient for significant alignments. This search revealed two clones that spliced in E20<sup>+</sup> (asterisks). One clone that only covers E20<sup>+</sup> (arrowhead) contains intron sequences upstream and downstream and may correspond to an intron retain clone. (C) EST support for a splicing variant with 25 bp exon E22<sup>+</sup> (PPP1R12A-205). This exon causes a frame shift and a premature stop. The human EST database was interrogated with the sequences corresponding to E22–E22<sup>+</sup>–E23. This search revealed a single sequence, BG180627.1, containing E22<sup>+</sup> (top hit with an asterisk). The second hit appears to correspond to a clone (BF980059.1) with anomalous splicing at the E22<sup>+</sup>–E23 boundary. One clone that appears to include E22<sup>+</sup> (at the bottom, asterisk) corresponds to a misaligned sequence and two more that only cover E22<sup>+</sup> (arrowheads) contain intron sequences upstream and downstream and may correspond to intron retain transcripts.

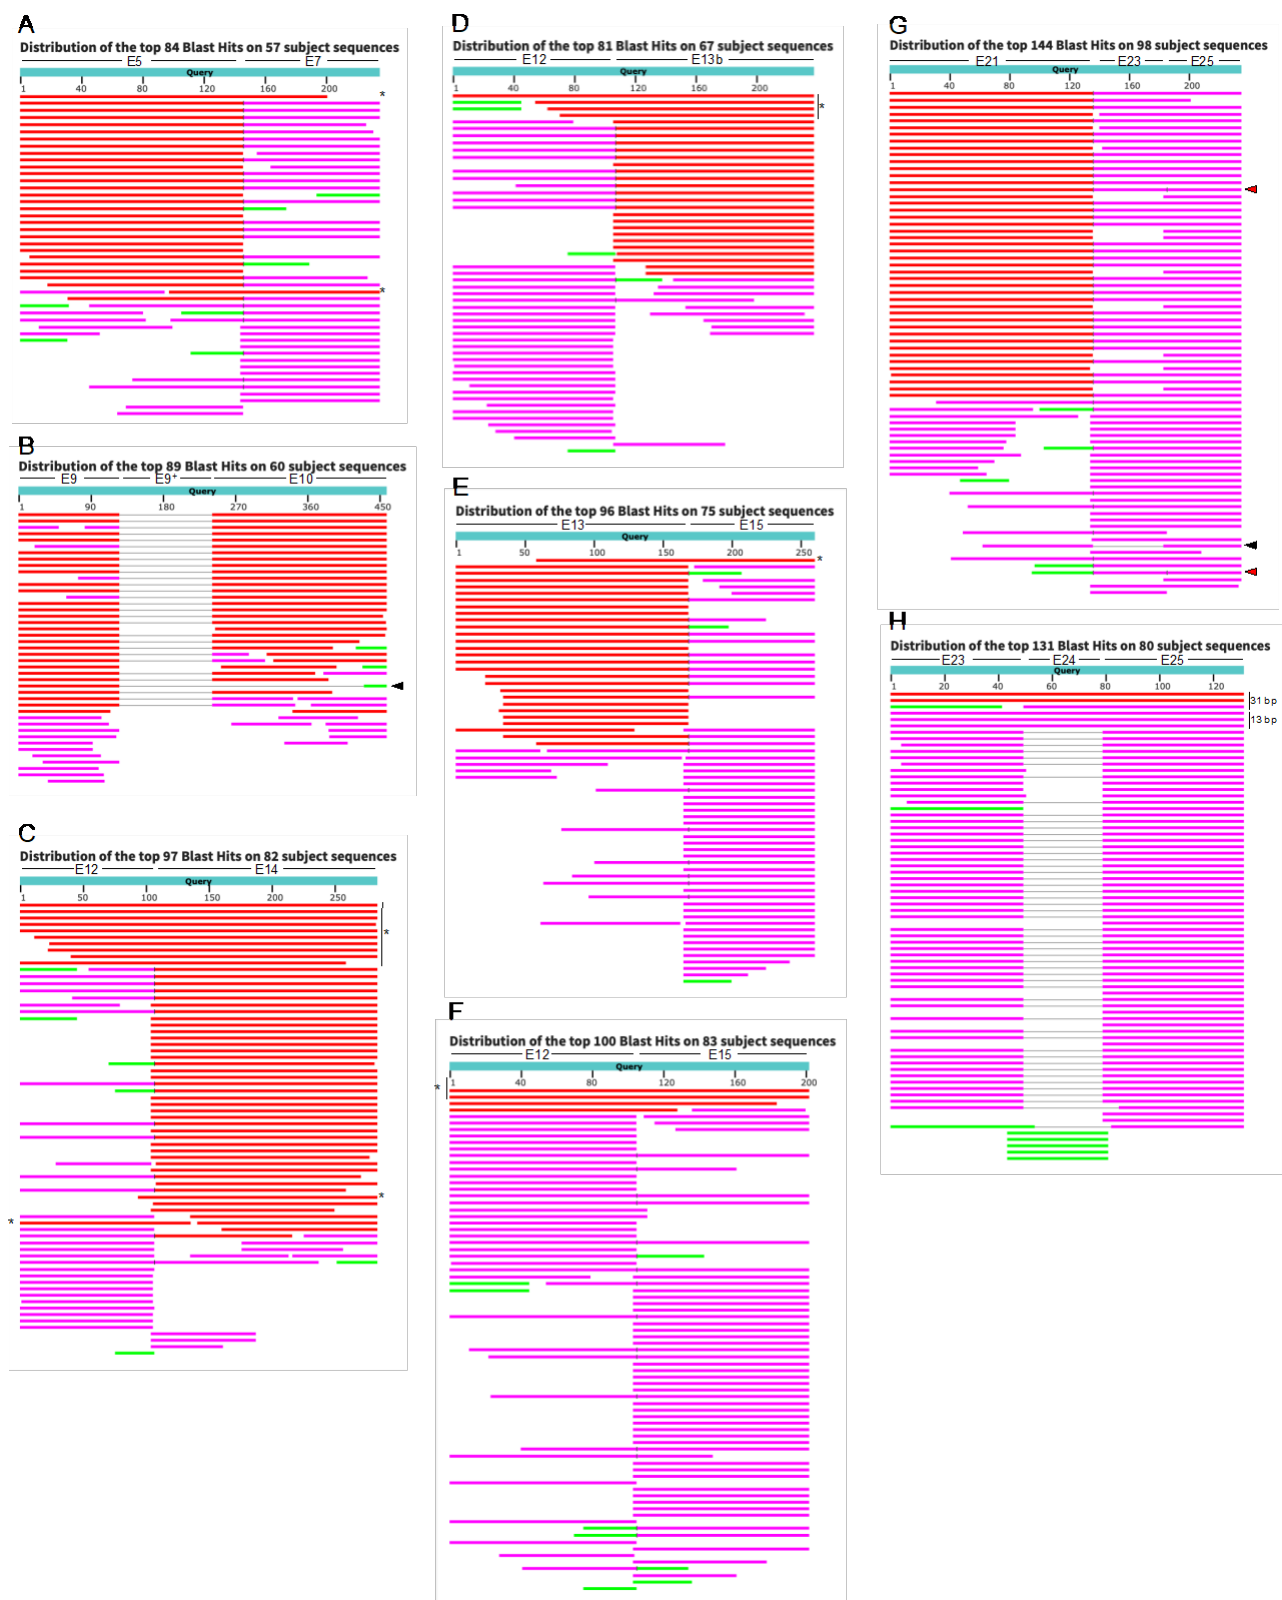

**Figure S4.** Results of BLASTn searches for ESTs in support of alternatively spliced exons. Separate aligned regions on the same database sequence are connected by a thin grey line. Vertical tick marks indicate intervening sequences not present in the query sequence. (A) Splicing of E6. The EST database was interrogated with the sequences corresponding to E5–E7. The boundary between E5 and E7 is placed at bp 145. Two ESTs were found in which E6 was spliced out (asterisks). (B) Splicing of 117 bp exon E9<sup>+</sup> (transcript PPP1R12A-223). The EST database was interrogated with the sequences corresponding to E9–E9<sup>+</sup>–E10. This search and a further search with the E9<sup>+</sup> sequence alone failed to reveal any ESTs including E9<sup>+</sup>. The sequence marked with an arrow showed anomalous splicing of E10. (C) Splicing of E13. The EST database was interrogated with the

sequences corresponding to E12–E14. The boundary between E12 and E14 is placed at bp 105. Twelve ESTs were found in which E13 was spliced out (asterisks). (D) An alternative splicing acceptor site in E13. The EST database was interrogated with the sequences corresponding to E12 plus E13b, a 32 bp truncated E13. The boundary between E12 and E13b is placed at bp 105. Four ESTs were found in support of this variant (asterisks). (E) Splicing of E14. The EST database was interrogated with the sequences corresponding to E13–E15. The boundary between E13 and E15 is placed at bp 168. One EST was found in which E14 was spliced out (asterisk). (F) Splicing of E13+E14. The EST database was interrogated with the sequences corresponding to E2–E15. The boundary between E12 and E15 is placed at bp 105. Four ESTs were found in which E13 and E14 were spliced out together (asterisks). (G) Splicing of E22. The EST database was interrogated with the sequences corresponding to E21–E23–E25. The boundary between E21 and E23 is placed at bp 136. Note the absence of EST clones splicing out E22. The clone marked with a black arrow head is anomalous, it contains E21 in sense fused to a fragment composed of E23+E24+E25 plus part of the coding region of E26 in antisense. The clones marked with red arrow heads splice in the 31 bp variant of E24 (tick mark at bp 184). (H) Splicing of E24. The EST database was interrogated with the sequences corresponding to E23–E24–E25 using the 31 bp variant of E24 (nucleotides 49–79 in the graph). Inspection of the six top hit alignments revealed three that include the 31 bp variant and three that include the 13 bp variant (the 18 bp difference is too short to be displayed in the graph). Five ESTs matching almost only E24 at the bottom of the graph (in green) probably correspond to intron-retaining transcripts (PPP1R12A-210 or 220).

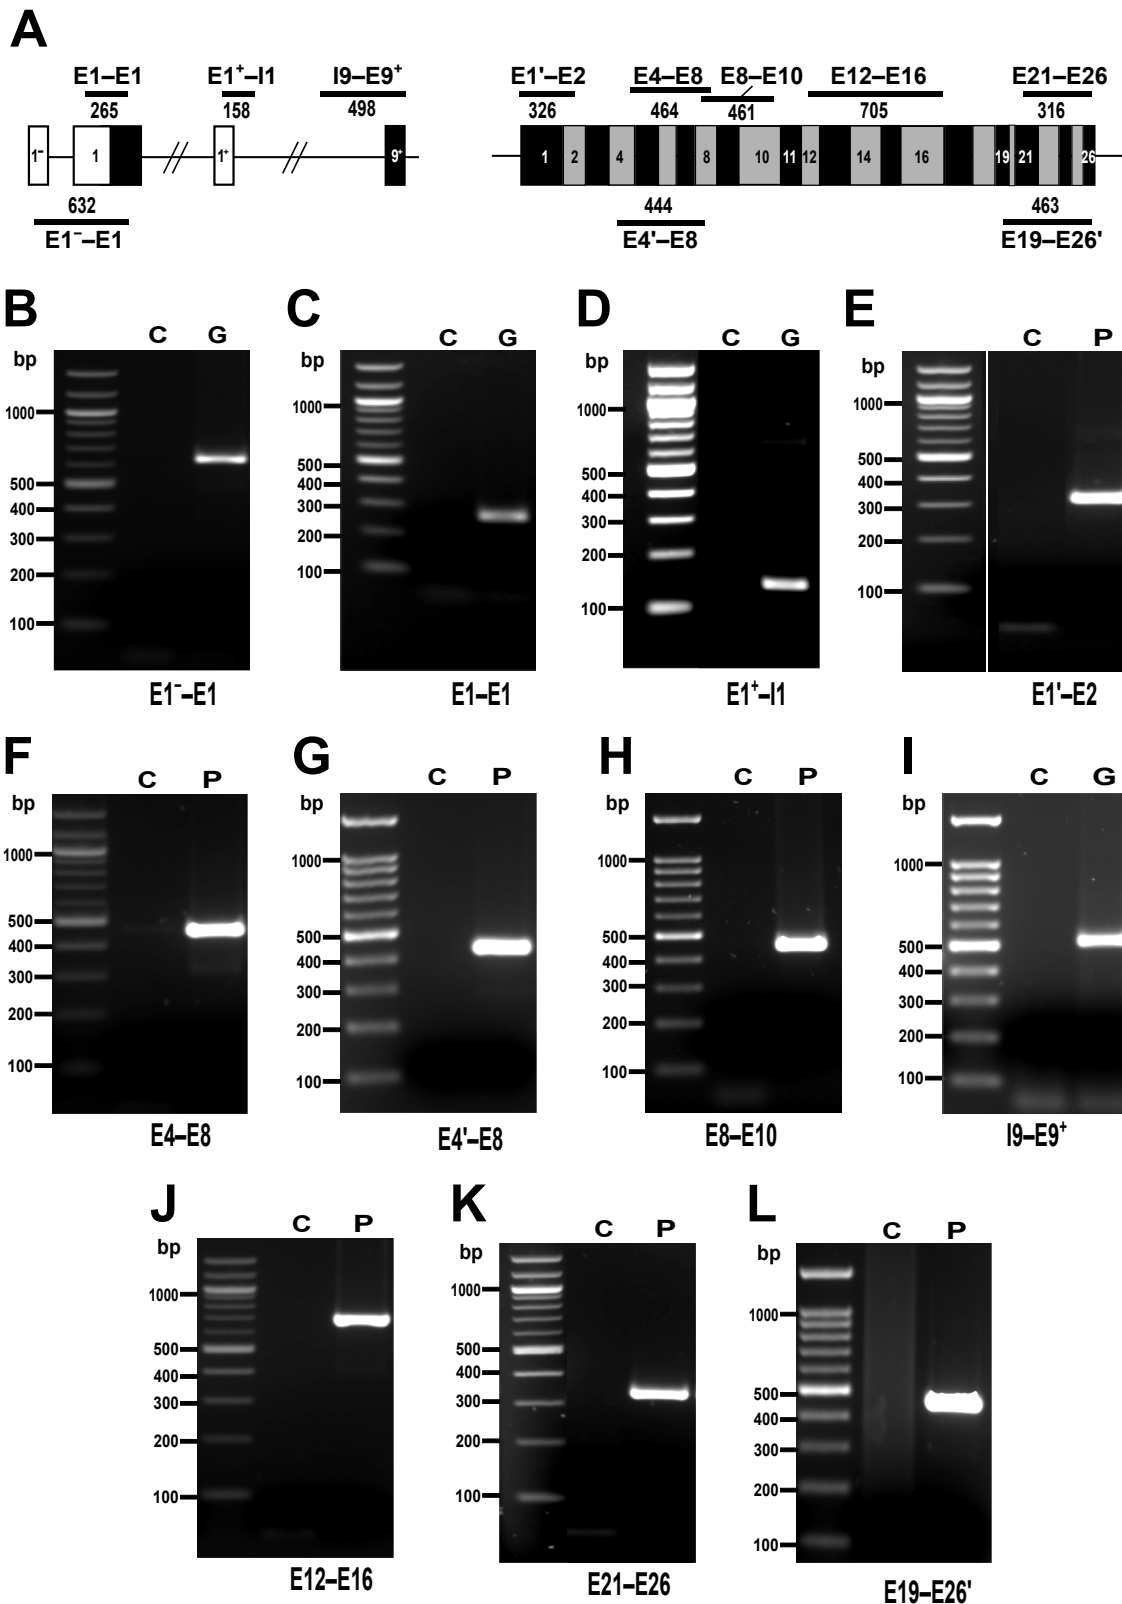

**Figure S5.** Test PCR reactions of *PPP1R12A* primers. (A) Position and expected size of PCR products. On the left, scheme of the genomic sequence around exons E1 and E9<sup>+</sup>; white and black boxes represent untranslated and translated regions, respectively. On the right, coding region of the canonical *PPP1R12A* FL variant (lacking E24); exons are shown at scale alternating black and grey. Primer pairs in the forward-reverse sequence and size of expected PCR products are indicated above and under the DNA schemes. Primer sequences and PCR conditions are shown in Table S1. (B-L) Results of PCR reactions using the primer combinations of the top panel. G, reactions were run using genomic DNA; P, reactions were run using a plasmid carrying the coding sequence of the FL *PPP1R12A* variant as template; C, control reaction without template.



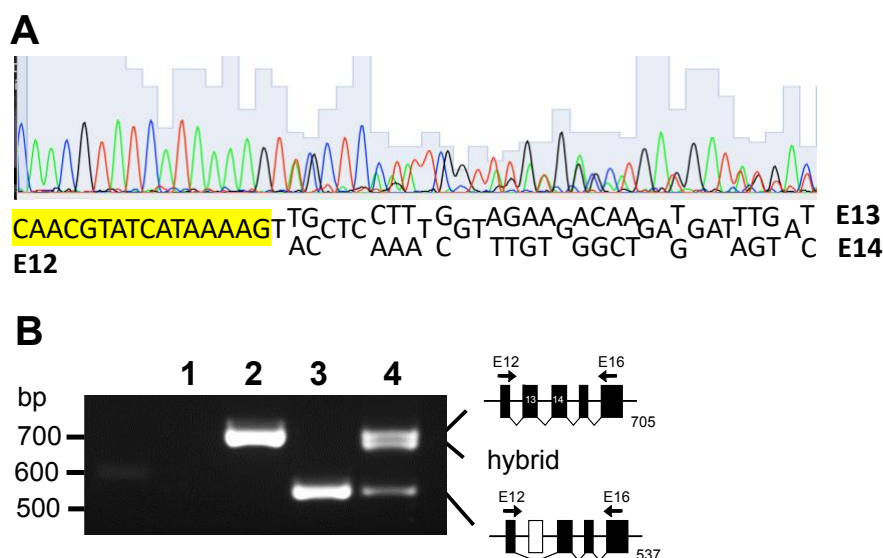

**Figure S6.** Hybridization of PCR products of reaction targeting E13 and E14 variants. (A) Fragment of the sequencing reaction chromatogram of a hybrid product (intermediate band) of the PCR reaction with primer pair E12-E16 (Fig. 5D). The hybrid band was purified from an agarose gel and sequenced with E12 forward primer. The 3' end of E12 is highlighted in yellow. It is followed by mixed sequences compatible with E13 and E14, confirming that the band is a hybrid of E13in and E13out DNA fragments. (B) Hybridization of E13in and E13out amplicons in a PCR reaction using plasmid DNA as template. Lane 1, negative control (no template); lane 2, plasmid containing full length MYPT1 cDNA as template; lane 3, plasmid containing an MYPT1 cDNA fragment lacking E13 as template; lane 4, mix of both plasmids as template.

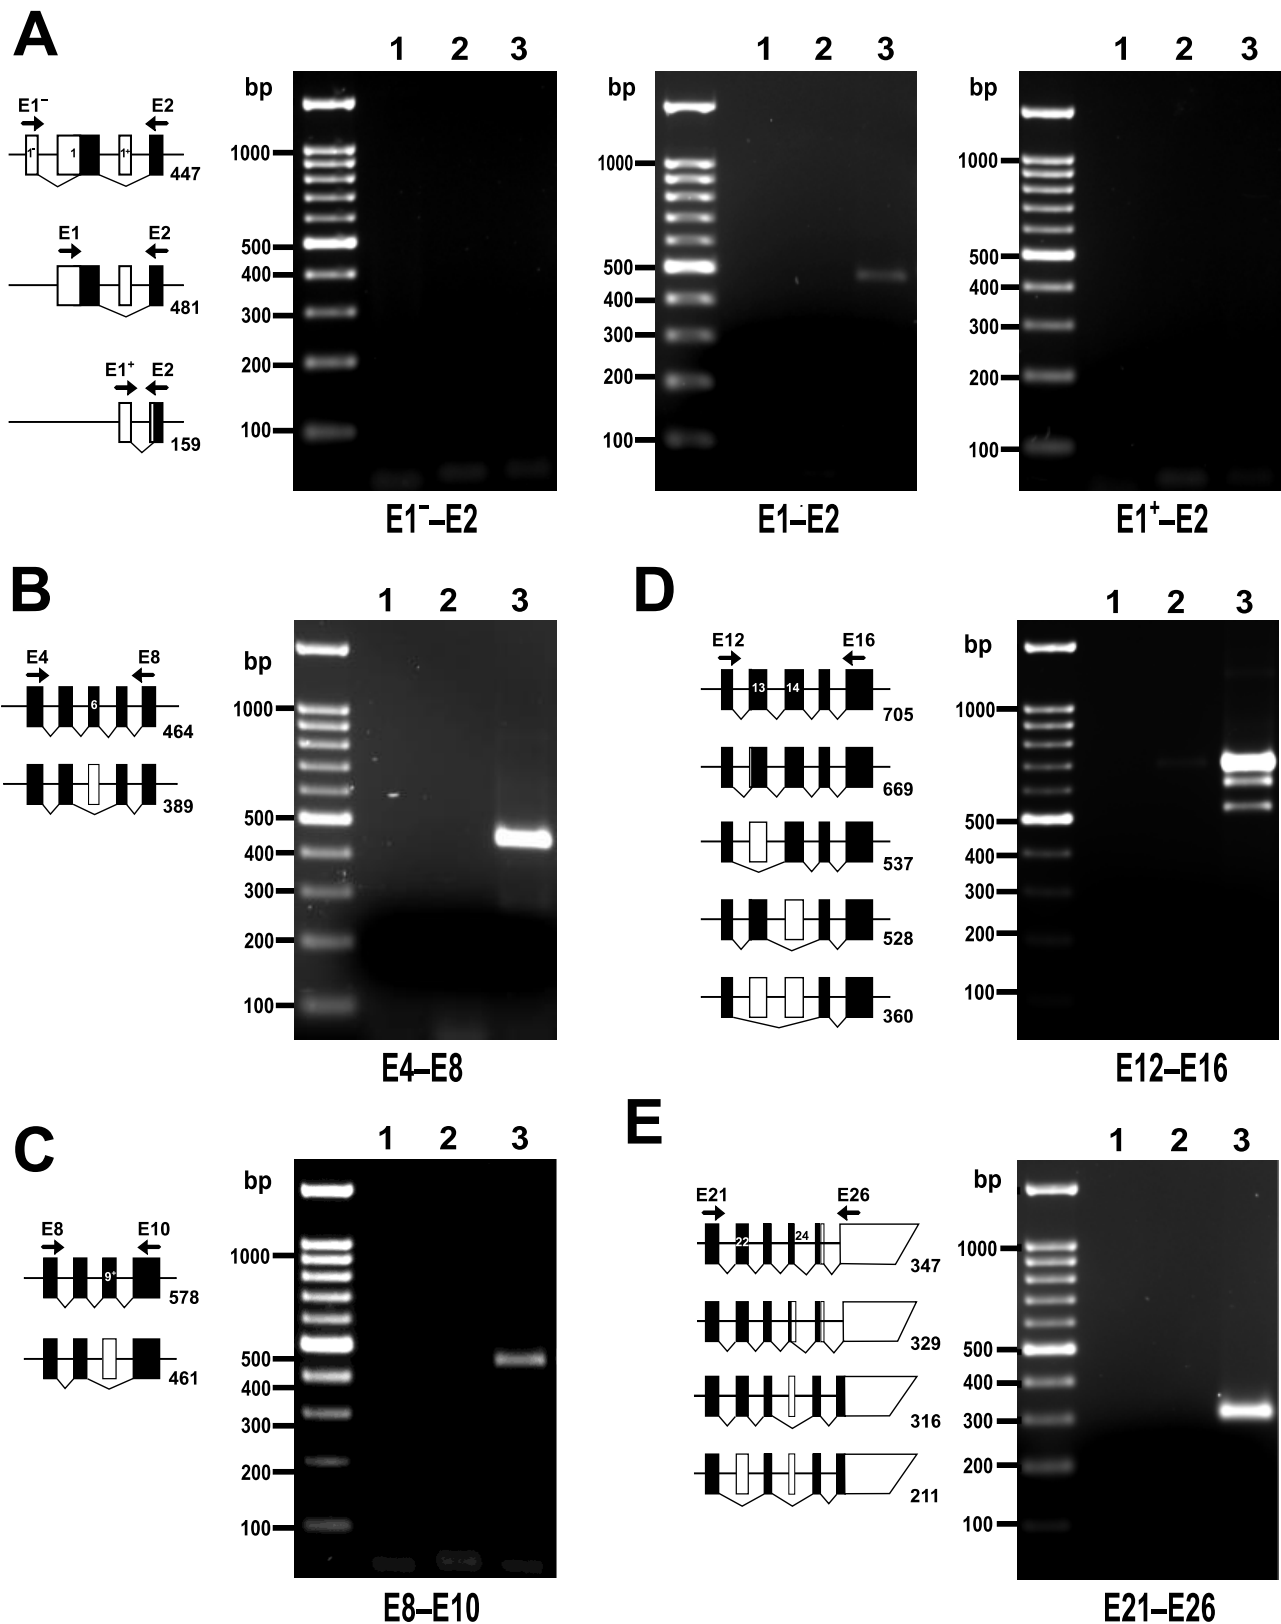

**Figure S7.** *PPP1R12A* transcripts in human saphenous vein smooth muscle cells as determined by RT-PCR. The diagrams accompanying each panel depict the expected size of PCR products corresponding to all possible alternatively spliced variants sorted by size. White and black boxes represent untranslated and translated exons, respectively. Exons are depicted at scale. Position of primer pairs is indicated schematically. (A) PCR reactions targeting alternative transcription start sites. A transcription start on E1 is the only site used by HSVSMCs. PCR reactions targeting (B) E6, (C) E9<sup>+</sup>, (D) E13 and E14, (E) E22 and E24 splicing variants. PCR reactions were run using no template (lane 1), negative control for reverse transcriptase (lane 2) or cDNA (lane 3) as templates. Primer sequences and PCR conditions are shown in Table S2.

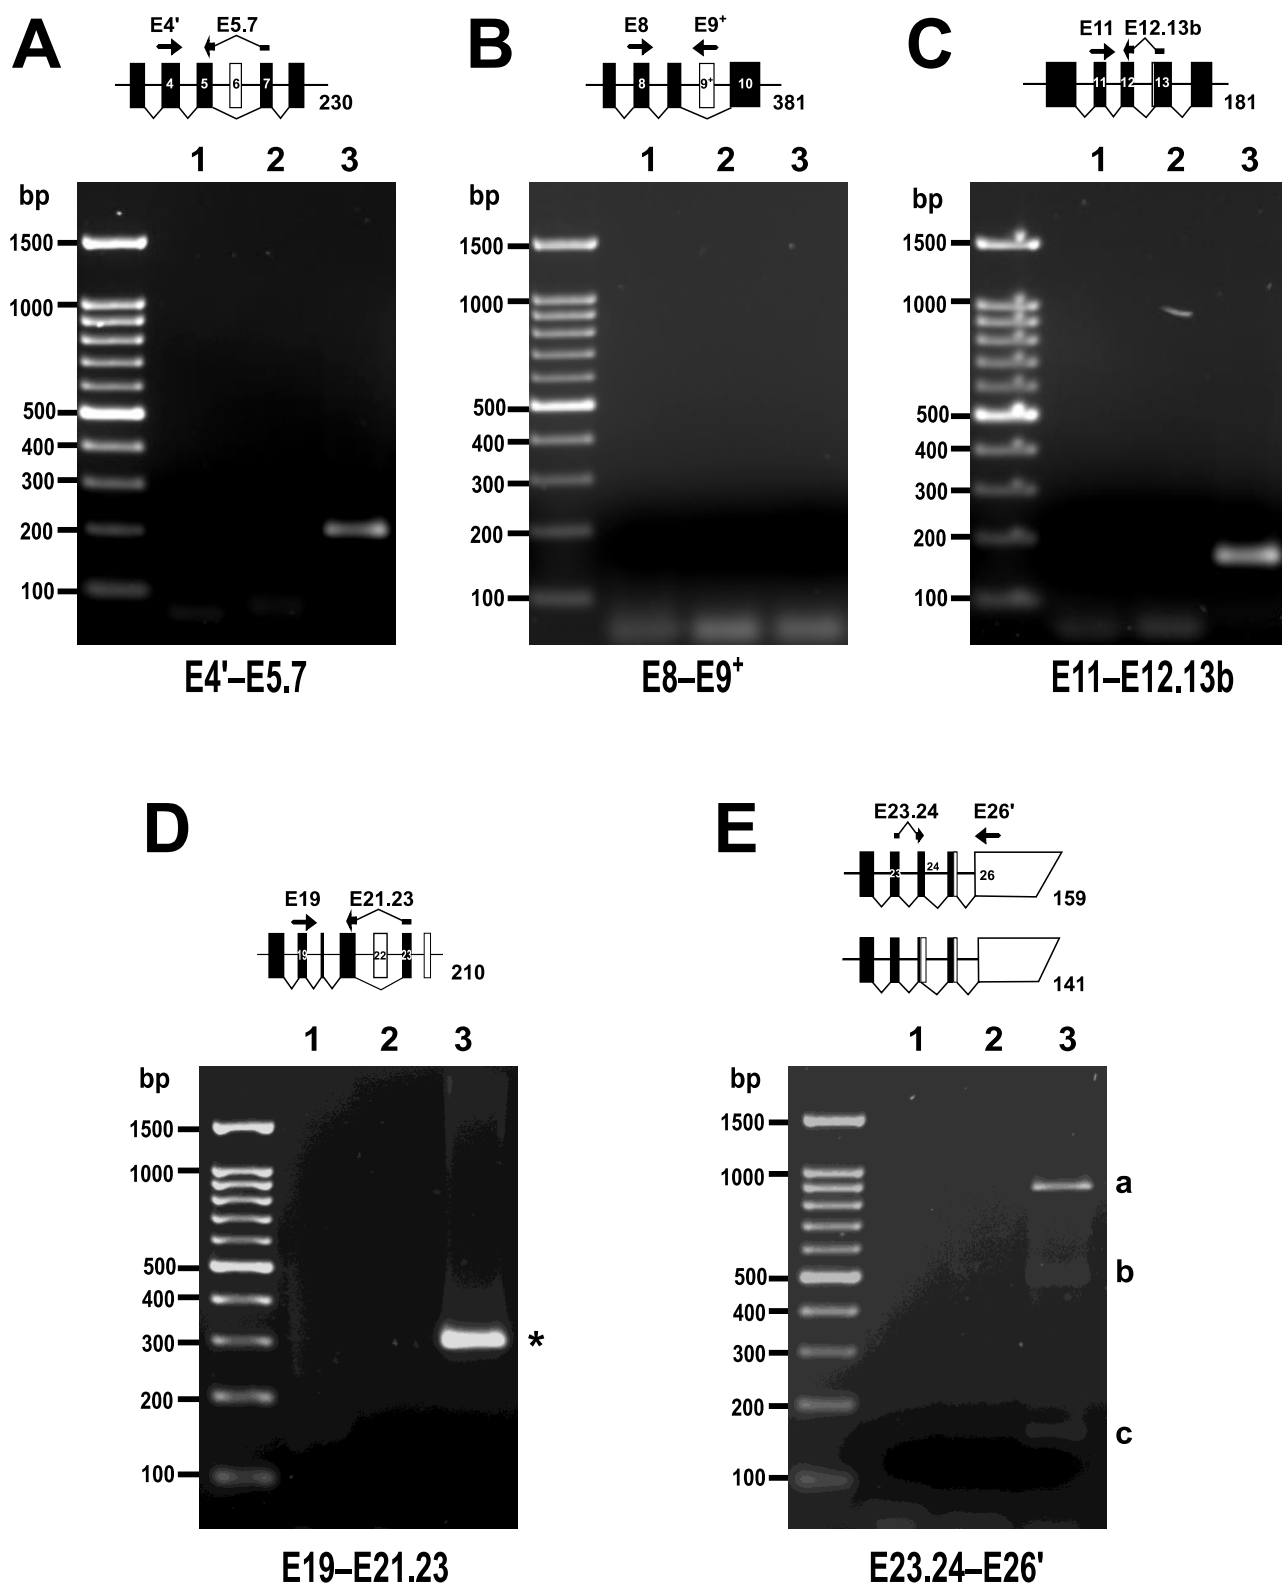

**Figure S8.** Rare *PPP1R12A* transcripts in human saphenous vein smooth muscle cells as determined by RT-PCR. The diagrams accompanying each panel depict the expected size of PCR products corresponding to the rare alternatively spliced variants. White and black boxes represent untranslated and translated exons, respectively. Exons are depicted at scale. Position of primer pairs is indicated schematically. PCR reactions targeting the (A)  $\Delta E6$ , (B)  $E9^+$ , (C)  $E13b$  and (D)  $\Delta E22$  splicing variants. The asterisk indicates an unexpected PCR product. (E) PCR reaction targeting  $LZ^-$  splicing variants. Bands a and b are unexpected amplicons, band c corresponds to the 159 bp product. PCR reactions were run using no template (lane 1), negative control for reverse transcriptase (lane 2) or cDNA (lane 3) as templates. Primer sequences and PCR conditions are shown in Table S2.

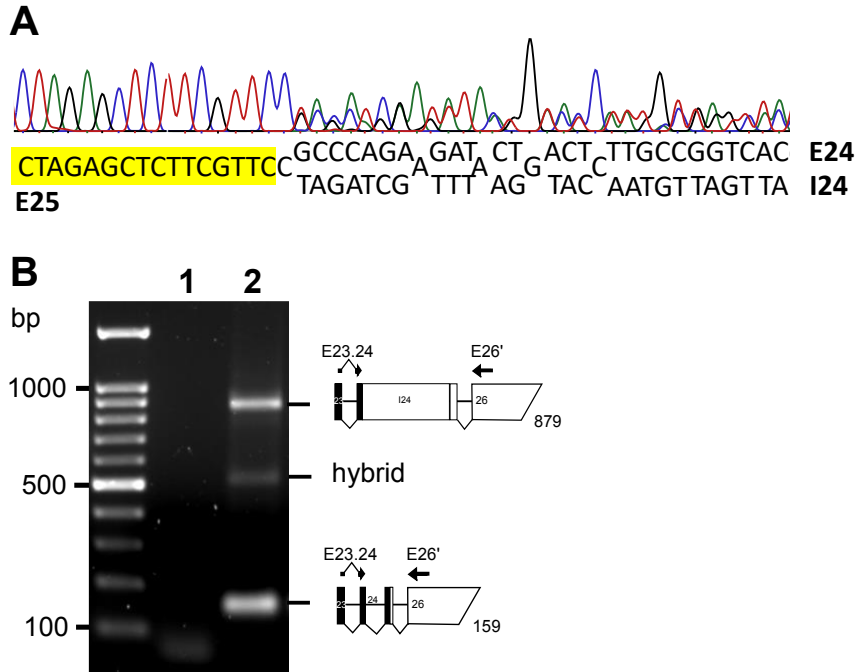

**Figure S9.** Hybridization of PCR products of the reaction targeting E24. (A) Fragment of the sequencing reaction chromatogram of a hybrid product (intermediate band) of the PCR reaction with primer pair E23.24–E26' (Fig. S8E). The hybrid band was purified from an agarose gel and sequenced with 26' reverse primer. The 5' end of E25 is highlighted in yellow. It is followed by mixed sequences compatible with E24 and I24, confirming that the band is a hybrid of E24in and retained intron DNA fragments. (B) Hybridization of E24in (159 bp) and a retained intron (879 bp) DNA in a PCR reaction using the hybrid band as template (lane 2). Lane 1 is a negative control (no template). This reaction yielded the 159 bp and the 879 bp along with a small amount of hybrid product.

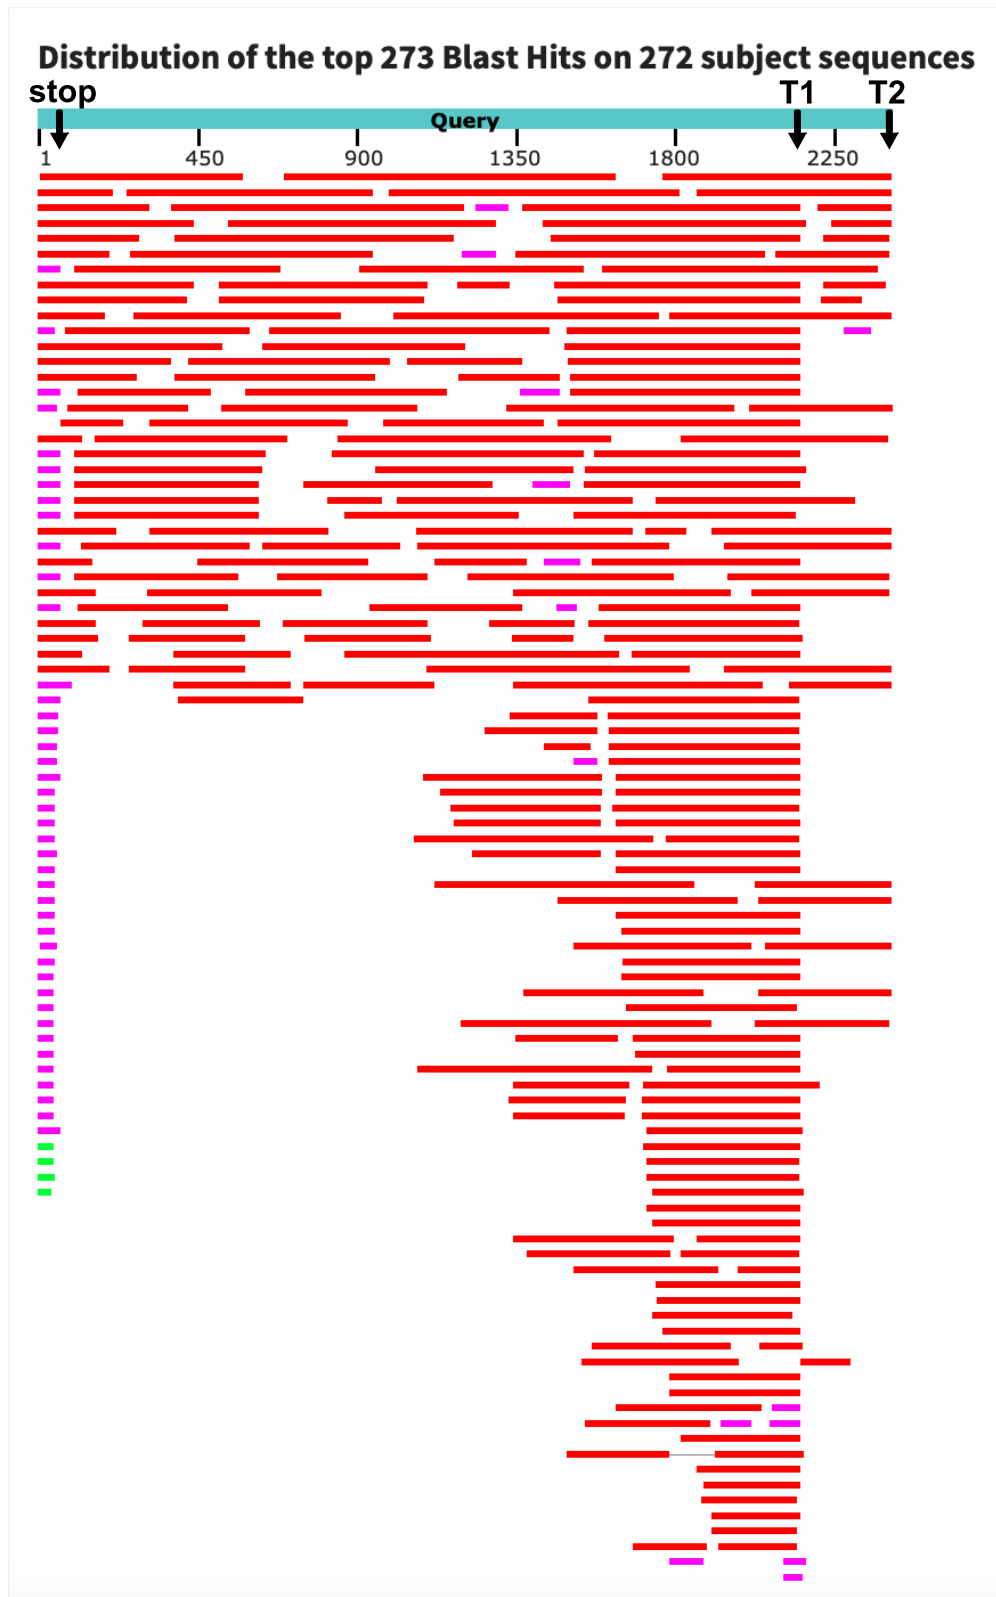

**Figure S10.** Results of BLASTn search for ESTs in the 3'-UTR region of *PPP1R12A*. The human EST database was interrogated with a BLASTn search using the sequences corresponding to the last 52 coding bp followed by the complete 3'-UTR. Horizontal bars represent the extent of the alignment of the database sequences to the query sequence and are color-coded by score: red, pink and green from highest to lowest. An accumulation of ESTs that terminate sharply approximately 2100 bp downstream of the stop codon suggests the presence of a terminator in that area (T1). A less common terminator (T2) is suggested 260 bp downstream of the first termination site.
